# Supplementary material for: Właściwości trójfazowego układu UPQC - modelowanie i weryfikacja eksperymentalna
Source: MDPI journal article supplement (doi:10.3390/gels8100674), 2005-01-01
Supplement: s1 [file s1]

# Supplementary Materials

## Secretion of *Bacillus amyloliquefaciens* Transglutaminase from *Lactococcus lactis* and Its Enhancement of Food Gel Properties

Tiange Ma <sup>1</sup>, Xingjiang Li <sup>1</sup>, Manuel Montalbán-López <sup>2</sup>, Xuefeng Wu <sup>1</sup>, Zhi Zheng <sup>1,\*</sup> and Dongdong Mu <sup>1,\*</sup>

<sup>1</sup> Anhui Fermented Food Engineering Research Center, School of Food and Biological Engineering, Hefei University of Technology, Hefei 230601, China

<sup>2</sup> Department of Microbiology, Faculty of Sciences, University of Granada, Granada 18071, Spain

\* Correspondence: d.mu@hfut.edu.cn (D.M.); zhengzhi@hfut.edu.cn (Z.Z.)

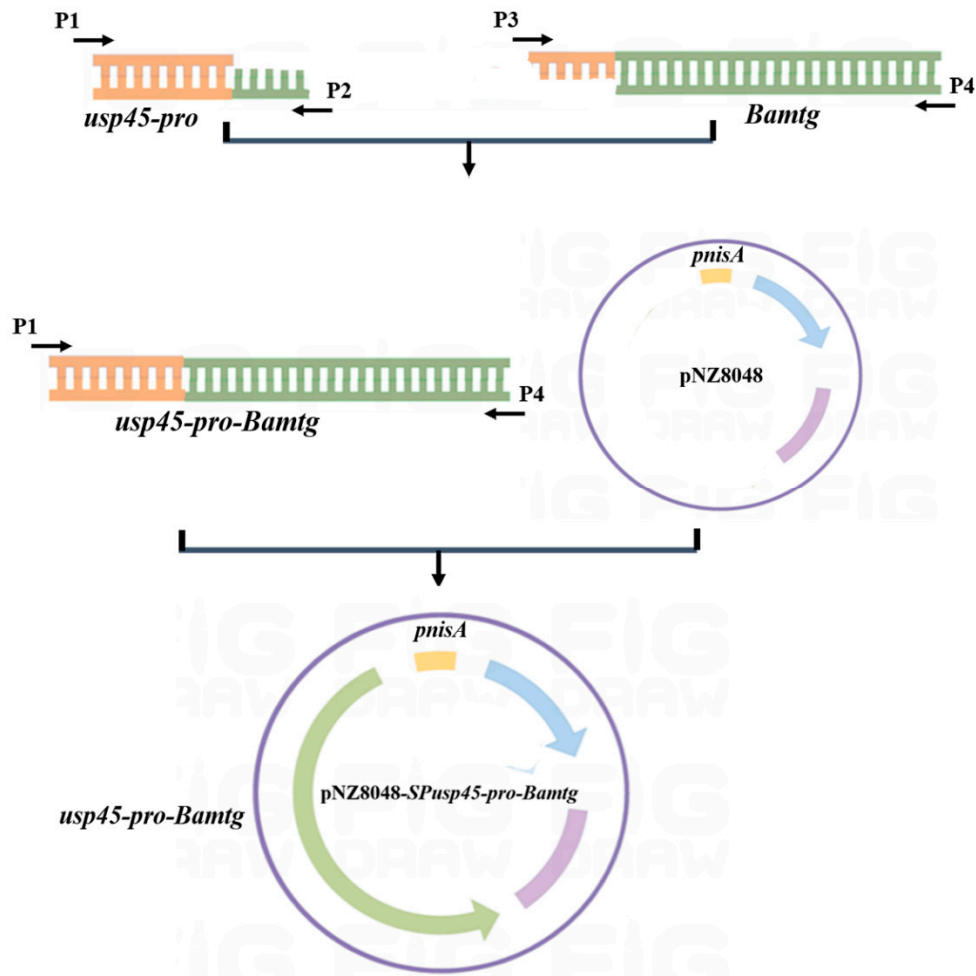

**Figure S1.** The construction progress of plasmid.

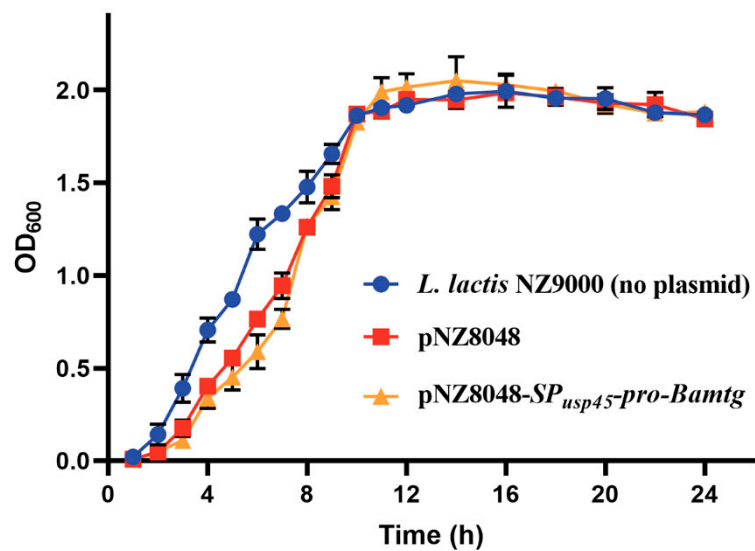

**Figure S2.** The growth curves of strains. Nisin was added when the OD is 0.6.
